# Supplementary material for: Melittin Constrains the Expression of Identified Key Genes Associated with Bladder Cancer
Source: Hindawi journal article supplement (doi:10.1155/2018/5038172), 2018-01-01

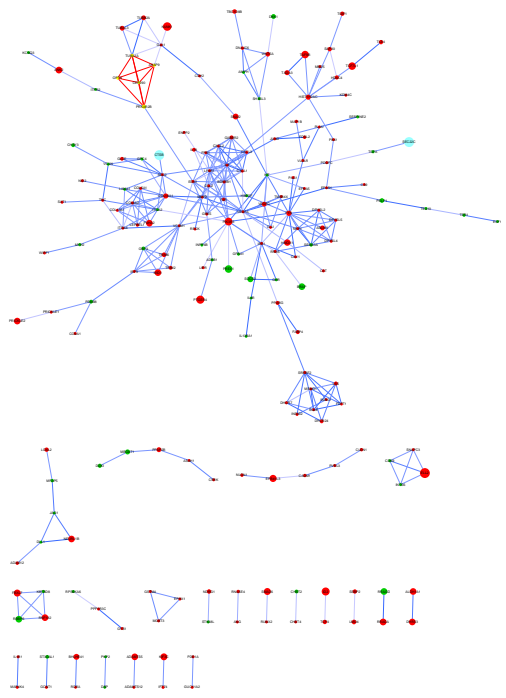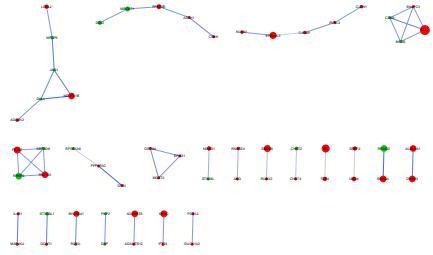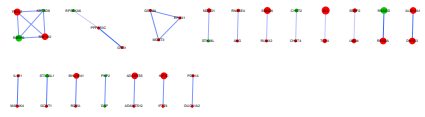

Supplement: f1 [file 5038172.f1.pdf]
